# Supplementary material for: Scientometric Research and Critical Analysis of Gait and Balance in Older Adults
Source: MDPI journal article supplement (doi:10.3390/s24103199), 2024-05-17
Supplement: s1 [file s1]

Table S1 Leading Journal Publications in gait and balance from 1993 to 2022

| Journal title                                                                   | Number of<br>articles | %Total<br>publications |
|---------------------------------------------------------------------------------|-----------------------|------------------------|
| GAIT POSTURE                                                                    | 499                   | 11.53                  |
| JOURNALS OF GERONTOLOGY SERIES A<br>BIOLOGICAL SCIENCES AND MEDICAL<br>SCIENCES | 114                   | 2.634                  |
| JOURNAL OF BIOMECHANICS                                                         | 93                    | 2.149                  |
| ARCHIVES OF PHYSICAL MEDICINE AND<br>REHABILITATION                             | 91                    | 2.103                  |
| BMC GERIATRICS                                                                  | 90                    | 2.079                  |
| JOURNAL OF THE AMERICAN GERIATRICS<br>SOCIETY                                   | 86                    | 1.987                  |
| AGING CLINICAL AND EXPERIMENTAL<br>RESEARCH                                     | 79                    | 1.825                  |
| JOURNAL OF GERIATRIC PHYSICAL THERAPY                                           | 71                    | 1.64                   |
| PLOS ONE                                                                        | 71                    | 1.64                   |
| PHYSICAL THERAPY                                                                | 69                    | 1.594                  |
| INTERNATIONAL JOURNAL OF<br>ENVIRONMENTAL RESEARCH AND PUBLIC<br>HEALTH         | 68                    | 1.571                  |
| JOURNAL OF AGING AND PHYSICAL ACTIVITY                                          | 66                    | 1.525                  |

|                                                   |    |       |
|---------------------------------------------------|----|-------|
| SENSORS                                           | 66 | 1.525 |
| ARCHIVES OF GERONTOLOGY AND<br>GERIATRICS         | 58 | 1.34  |
| EXPERIMENTAL BRAIN RESEARCH                       | 53 | 1.225 |
| EXPERIMENTAL GERONTOLOGY                          | 53 | 1.225 |
| FRONTIERS IN AGING NEUROSCIENCE                   | 53 | 1.225 |
| CLINICAL BIOMECHANICS                             | 50 | 1.155 |
| JOURNAL OF NEUROENGINEERING AND<br>REHABILITATION | 49 | 1.132 |
| GERONTOLOGY                                       | 45 | 1.04  |
| SCIENTIFIC REPORTS                                | 42 | 0.97  |
| HUMAN MOVEMENT SCIENCE                            | 41 | 0.947 |
| JOURNAL OF PHYSICAL THERAPY SCIENCE               | 41 | 0.947 |
| AGE AND AGEING                                    | 39 | 0.901 |
| CLINICAL REHABILITATION                           | 39 | 0.901 |
| DISABILITY AND REHABILITATION                     | 39 | 0.901 |
| CLINICAL INTERVENTIONS IN AGING                   | 37 | 0.855 |

|                                                          |    |       |
|----------------------------------------------------------|----|-------|
| JOURNAL OF THE AMERICAN MEDICAL<br>DIRECTORS ASSOCIATION | 37 | 0.855 |
| FRONTIERS IN NEUROLOGY                                   | 36 | 0.832 |
| GERIATRICS GERONTOLOGY<br>INTERNATIONAL                  | 35 | 0.809 |
| TOPICS IN GERIATRIC REHABILITATION                       | 32 | 0.739 |
| JOURNAL OF NUTRITION HEALTH AGING                        | 29 | 0.67  |
| AMERICAN JOURNAL OF PHYSICAL MEDICINE<br>REHABILITATION  | 26 | 0.601 |
| JOURNAL OF NEUROPHYSIOLOGY                               | 25 | 0.578 |
| PHYSIOTHERAPY THEORY AND PRACTICE                        | 25 | 0.578 |
| JOURNAL OF NEUROLOGIC PHYSICAL<br>THERAPY                | 24 | 0.555 |
| FRONTIERS IN HUMAN NEUROSCIENCE                          | 22 | 0.508 |
| JOURNAL OF MOTOR BEHAVIOR                                | 22 | 0.508 |
| NEUROREHABILITATION AND NEURAL<br>REPAIR                 | 22 | 0.508 |
| EUROPEAN REVIEW OF AGING AND PHYSICAL<br>ACTIVITY        | 21 | 0.485 |
| BMC NEUROLOGY                                            | 19 | 0.439 |
| MATURITAS                                                | 19 | 0.439 |

|                                       |    |       |
|---------------------------------------|----|-------|
| BRAIN SCIENCES                        | 17 | 0.393 |
| JOURNAL OF CLINICAL MEDICINE          | 17 | 0.393 |
| FRONTIERS IN MEDICINE                 | 16 | 0.37  |
| FRONTIERS IN SPORTS AND ACTIVE LIVING | 16 | 0.37  |

---
