# Supplementary material for: Scientometric Research and Critical Analysis of Gait and Balance in Older Adults
Source: MDPI journal article supplement (doi:10.3390/s24103199), 2024-05-17
Supplement: s1 [file s1]

Table S2 Leading Conference Publications in gait and balance from 1993 to 2022

| Conference title                                                                                                | Number of articles | %Total publications |
|-----------------------------------------------------------------------------------------------------------------|--------------------|---------------------|
| IEEE ENGINEERING IN MEDICINE AND BIOLOGY SOCIETY CONFERENCE PROCEEDINGS                                         | 18                 | 18.182              |
| 2011 ANNUAL INTERNATIONAL CONFERENCE OF THE IEEE ENGINEERING IN MEDICINE AND BIOLOGY SOCIETY EMBC GERONTOLOGIST | 6                  | 6.061               |
| MEDICINE AND SCIENCE IN SPORTS AND EXERCISE                                                                     | 6                  | 6.061               |
| IEEE INTERNATIONAL CONFERENCE ON SYSTEMS MAN AND CYBERNETICS CONFERENCE PROCEEDINGS                             | 5                  | 5.051               |
| JOURNAL OF THE AMERICAN GERIATRICS SOCIETY LECTURE NOTES IN COMPUTER SCIENCE                                    | 4                  | 4.040               |
| 2013 35TH ANNUAL INTERNATIONAL CONFERENCE OF THE IEEE ENGINEERING IN MEDICINE AND BIOLOGY SOCIETY EMBC          | 4                  | 4.040               |
| 2021 43RD ANNUAL INTERNATIONAL CONFERENCE OF THE IEEE ENGINEERING IN MEDICINE BIOLOGY SOCIETY EMBC              | 4                  | 4.040               |
| INTERNATIONAL CONFERENCE ON REHABILITATION ROBOTICS ICORR                                                       | 3                  | 3.030               |
| 2016 38TH ANNUAL INTERNATIONAL CONFERENCE OF THE IEEE ENGINEERING IN MEDICINE AND BIOLOGY SOCIETY EMBC          | 3                  | 3.030               |
| ASSISTIVE TECHNOLOGY RESEARCH SERIES                                                                            | 3                  | 3.030               |
| IEEE INTERNATIONAL SYMPOSIUM ON MEDICAL MEASUREMENTS AND APPLICATIONS PROCEEDINGS MEMEA                         | 2                  | 2.020               |
| INTERNATIONAL CONGRESS SERIES                                                                                   | 2                  | 2.020               |
| JOURNAL OF AGING AND PHYSICAL ACTIVITY                                                                          | 2                  | 2.020               |
| VESTIBULAR AND NEURAL FRONT                                                                                     | 2                  | 2.020               |
| 11TH IEEE SYMPOSIUM ON COMPUTER APPLICATIONS INDUSTRIAL ELECTRONICS ISCAIE 2021                                 | 1                  | 1.010               |
| 12TH INTERNATIONAL CONFERENCE ON KINANTHROPOLOGY                                                                | 1                  | 1.010               |
| 2006 28TH ANNUAL INTERNATIONAL CONFERENCE OF THE IEEE ENGINEERING IN MEDICINE AND BIOLOGY SOCIETY VOLS 1 15     | 1                  | 1.010               |
| 2006 IEEE INTERNATIONAL CONFERENCE ON SYSTEMS MAN AND CYBERNETICS VOLS 1 6 PROCEEDINGS                          | 1                  | 1.010               |
| 2007 IEEE INTERNATIONAL CONFERENCE ON SYSTEMS MAN AND CYBERNETICS VOLS 1 8                                      | 1                  | 1.010               |
| 2007 VIRTUAL REHABILITATION                                                                                     | 1                  | 1.010               |
| 2008 IEEE INTERNATIONAL CONFERENCE ON SYSTEMS MAN AND CYBERNETICS SMC VOLS 1 6                                  | 1                  | 1.010               |
| 2009 VIRTUAL REHABILITATION INTERNATIONAL CONFERENCE                                                            | 1                  | 1.010               |

|                                                                                                              |   |       |
|--------------------------------------------------------------------------------------------------------------|---|-------|
| 2010 ANNUAL INTERNATIONAL CONFERENCE OF THE<br>IEEE ENGINEERING IN MEDICINE AND BIOLOGY<br>SOCIETY EMBC      | 1 | 1.010 |
| 2011 INTERNATIONAL CONFERENCE OF<br>ENVIRONMENTAL SCIENCE AND ENGINEERING VOL 12<br>PT B                     | 1 | 1.010 |
| 2012 ANNUAL INTERNATIONAL CONFERENCE OF THE<br>IEEE ENGINEERING IN MEDICINE AND BIOLOGY<br>SOCIETY EMBC      | 1 | 1.010 |
| 2012 SIXTH INTERNATIONAL CONFERENCE ON<br>SENSING TECHNOLOGY ICST                                            | 1 | 1.010 |
| 2014 IEEE HEALTHCARE INNOVATION CONFERENCE<br>HIC                                                            | 1 | 1.010 |
| 2015 IEEE INTERNATIONAL SYMPOSIUM ON MEDICAL<br>MEASUREMENTS AND APPLICATIONS MEMEA<br>PROCEEDINGS           | 1 | 1.010 |
| 2015 INTERNATIONAL CONFERENCE ON VIRTUAL<br>REHABILITATION PROCEEDINGS ICVR                                  | 1 | 1.010 |
| 2017 39TH ANNUAL INTERNATIONAL CONFERENCE OF<br>THE IEEE ENGINEERING IN MEDICINE AND BIOLOGY<br>SOCIETY EMBC | 1 | 1.010 |

---
